# Supplementary material for: Cell-free prediction of protein expression costs for growing cells
Source: PubMed Central journal article supplement (PMC5899134; doi:10.1038/s41467-018-03970-x), 2018-04-13
Supplement: 41467_2018_3970_MOESM3_ESM.pdf [file 41467_2018_3970_MOESM3_ESM.pdf]

## **Description of Additional Supplementary Files**

File Name: Supplementary Data 1

Description: Experimental data used to generate the figures in this work
